# Supplementary material for: Functionalized calcium silicate nanofibers with hierarchical structure derived from oyster shells and their application in heavy metal ions removal
Source: Royal Society of Chemistry journal article supplement (doi:10.1039/c6cp01199c), 2016-01-01
Supplement: c6cp01199c1.pdf [file c6cp01199c1.pdf]

**Supporting Information for**  
**Functionalized calcium silicate nanofibers with hierarchical structure**  
**derived from oyster shells and its application in heavy metal ions removal**

Weijie You<sup>a,b</sup>, Mingzhu Hong<sup>a,b</sup>, HaiFeng Zhang<sup>a,b</sup>, Qiuping Wu<sup>a,b</sup>,  
Zanyong Zhuang<sup>a,b\*</sup>, Yan Yu<sup>a,b\*</sup>

<sup>a</sup> Key Laboratory of Eco-materials Advanced Technology (Fuzhou University), Fujian Province University, China

<sup>b</sup> College of Materials Science and Engineering, Fuzhou University, New Campus, Minhou, Fujian Province 350108, China

\*Corresponding author. Fax: +86 591 22866534;  
E-mail address: zyzhuang@fzu.edu.cn, yuyan\_1972@126.com

**EDS analysis of CSH**

The EDS analysis of CSH was showed in Fig.S1. The peaks of Ca. Si. O. C can be observed. It indicates that the CSH is a mixture of calcium silicate hydrates and calcium carbonate. The peak intensity of C is much weak shows a low content of calcium carbonate. In other words, the CSH is mainly composed of calcium silicate.

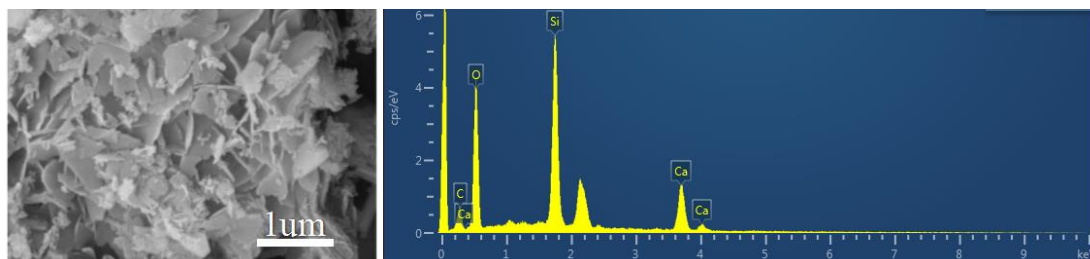

Figure S1. The SEM image and EDS analysis of CSH.
